# Supplementary material for: Ubiquitination of phytoene synthase 1 precursor modulates carotenoid biosynthesis in tomato
Source: PubMed Central journal article supplement (PMC7713427; doi:10.1038/s42003-020-01474-3), 2020-12-03
Supplement: 42003_2020_1474_MOESM2_ESM.pdf [file 42003_2020_1474_MOESM2_ESM.pdf]

## **Description of Additional Supplementary Files**

**File Name: Supplementary Data 1**

**Description:** Identification of differentially expressed proteins in the ppsr1tomato fruit using iTRAQ-based quantitative proteomic analysis

**File Name: Supplementary Data 2**

**Description:** Identification of ubiquitinated peptides that changed abundance in the ppsr1mutant using SWATH-MS approach

**File Name: Supplementary Data 3**

**Description:** Primers used in this study

**File Name: Supplementary Data 4**

**Description:** Source data for Figure 2, 3, 6 and Supplementary Figure 1
